# Supplementary material for: Large-Scale Detection of Telomeric Motif Sequences in Genomic Data Using TelFinder
Source: PubMed Central journal article supplement (PMC10100673; doi:10.1128/spectrum.03928-22), 2023-02-27
Supplement: spectrum.03928-22-s0001.pdf [file spectrum.03928-22-s0001.pdf]

Table S1: Application of TelFinder to a reference dataset in Telomerase Database

|               | species                                | Sequences | References                                                                                                                                                                                                                                                                     | genomic | TelFinder | Accordance | chr with telomere                                                                                                                                                                                           | telchrN/allchrN | max Tellen |
|---------------|----------------------------------------|-----------|--------------------------------------------------------------------------------------------------------------------------------------------------------------------------------------------------------------------------------------------------------------------------------|---------|-----------|------------|-------------------------------------------------------------------------------------------------------------------------------------------------------------------------------------------------------------|-----------------|------------|
| Invertebrates | Tribolium castaneum (red flour beetle) | TCAGG     | Osanai, M., Kojima, K. K., Futahashi, R., Yaguchi, S., & Fujiwara, H. (2006). Identification and characterization of the telomerase reverse transcriptase of Bombyx mori (silkworm) and Tribolium castaneum (flour beetle). <i>Gene</i> , 376(2), 281–289.                     | yes     | TCAGG     | yes        | NC_007417.3;<br>NC_007424.3;<br>NC_007425.3                                                                                                                                                                 | 3/11            | 199        |
|               | Tribolium confusum                     | TCAGG     | Mravinac, B., Meštrović, N., Cavrak, V. V., & Plohl, M. (2011). TCAGG, an alternative telomeric sequence in insects. <i>Chromosoma</i> , 120(4), 367–376.                                                                                                                      | yes     | TCAGG     | yes        | CM032790.1                                                                                                                                                                                                  | 1/8             | 373        |
|               | Apis mellifera (honey bee)             | TTAGG     | Sahara, K., Marec, F., & Traut, W. (1999). TTAGG telomeric repeats in chromosomes of some insects and other arthropods. <i>Chromosome research : an international journal on the molecular, supramolecular and evolutionary aspects of chromosome biology</i> , 7(6), 449–460. | yes     | TTAGG     | yes        | NC_037644.1;<br>NC_037640.1;<br>NC_037645.1;<br>NC_037638.1;<br>NC_037639.1;<br>NC_037651.1;<br>NC_037647.1;<br>NC_037653.1;<br>NC_037641.1;<br>NC_037650.1;<br>NC_037643.1;<br>NC_037652.1;<br>NC_037649.1 | 13/17           | 11785      |

|              |                                           |             |                                                                                                                                                                                                                                                                 |     |             |     |                                                                                                                                                                                                                                                                                                                                                                                                                  |       |       |
|--------------|-------------------------------------------|-------------|-----------------------------------------------------------------------------------------------------------------------------------------------------------------------------------------------------------------------------------------------------------------|-----|-------------|-----|------------------------------------------------------------------------------------------------------------------------------------------------------------------------------------------------------------------------------------------------------------------------------------------------------------------------------------------------------------------------------------------------------------------|-------|-------|
|              | Mamestra brassicae (cabbage moth)         | TTAGG       | Frydrychová, R., Grossmann, P., Trubac, P., Vítková, M., & Marec, F. (2004). Phylogenetic distribution of TTAGG telomeric repeats in insects. <i>Genome</i> , 47(1), 163–178.                                                                                   | yes | TTAGG       | yes | LR990988.1;<br>LR990991.1;<br>LR990992.1;<br>LR990993.1;<br>LR990995.1;<br>LR990996.1;<br>LR990997.1;<br>LR990998.1;<br>LR990999.1;<br>LR991000.1;<br>LR991001.1;<br>LR991003.1;<br>LR991004.1;<br>LR991005.1;<br>LR991006.1;<br>LR991007.1;<br>LR991008.1;<br>LR991009.1;<br>LR991010.1;<br>LR991011.1;<br>LR991012.1;<br>LR991013.1;<br>LR991014.1;<br>LR991015.1;<br>LR991016.1;<br>LR991017.1;<br>LR990987.1 | 23/32 | 15850 |
|              | Ascaris suum                              | TTAGGC      | Teixeira, M. T., & Gilson, E. (2005). Telomere maintenance, function and evolution: the yeast paradigm. <i>Chromosome research : an international journal on the molecular, supramolecular and evolutionary aspects of chromosome biology</i> , 13(5), 535–548. | yes | TTAGGC      | yes | CM024168.1;<br>CM024170.1;<br>CM024188.1;<br>CM024172.1;<br>CM024174.1;<br>CM024190.1                                                                                                                                                                                                                                                                                                                            | 6/25  | 49704 |
|              | Caenorhabditis elegans                    | TTAGGC      | Cangiano, G., & La Volpe, A. (1993). Repetitive DNA sequences located in the terminal portion of the <i>Caenorhabditis elegans</i> chromosomes. <i>Nucleic acids research</i> , 21(5), 1133–1139.                                                               | yes | TTAGGC      | yes | NC_003279.8;<br>NC_003280.10;<br>NC_003281.10;<br>NC_003282.8;<br>NC_003283.11;<br>NC_003284.9                                                                                                                                                                                                                                                                                                                   | 6/7   | 845   |
| <b>Fungi</b> | Schizosaccharomyces pombe (fission yeast) | G2–8TTAC(A) | Joseph, I., & Lustig, A. J. (2007). Telomeres in meiotic recombination: the yeast side story. <i>Cellular and molecular life sciences : CMLS</i> , 64(2), 125–130.                                                                                              | yes | G2–8TTAC(A) | /   | /                                                                                                                                                                                                                                                                                                                                                                                                                | /     | /     |

|                                          |                                    |                                                                                                                                                                                                                                                         |     |                                    |     |                                                                                             |     |     |
|------------------------------------------|------------------------------------|---------------------------------------------------------------------------------------------------------------------------------------------------------------------------------------------------------------------------------------------------------|-----|------------------------------------|-----|---------------------------------------------------------------------------------------------|-----|-----|
| Saccharomyces cerevisiae (baker's yeast) | T(G)2-3(TG)1-6                     | McEachern, M. J., & Blackburn, E. H. (1994). A conserved sequence motif within the exceptionally diverse telomeric sequences of budding yeasts. Proceedings of the National Academy of Sciences of the United States of America, 91(8), 3453–3457.      | yes | T(G)2-3(TG)1-6                     | /   | /                                                                                           | /   | /   |
| Saccharomyces bayanus                    | T(G)2-3(TG)1-6                     | Teixeira, M. T., & Gilson, E. (2005). Telomere maintenance, function and evolution: the yeast paradigm. Chromosome research : an international journal on the molecular, supramolecular and evolutionary aspects of chromosome biology, 13(5), 535–548. | yes | T(G)2-3(TG)1-6                     | /   | /                                                                                           | /   | /   |
| Saccharomyces paradoxus                  | T(G)2-3(TG)1-6                     | Teixeira, M. T., & Gilson, E. (2005). Telomere maintenance, function and evolution: the yeast paradigm. Chromosome research : an international journal on the molecular, supramolecular and evolutionary aspects of chromosome biology, 13(5), 535–548. | yes | T(G)2-3(TG)1-6                     | /   | /                                                                                           | /   | /   |
| Saccharomyces castellii                  | TCTGGG(TG)1-4                      | Cohn, M., & Blackburn, E. H. (1995). Telomerase in yeast. Science (New York, N.Y.), 269(5222), 396–400.                                                                                                                                                 | yes | T(G)2-3(TG)1-6                     | /   | /                                                                                           | /   | /   |
| Saccharomyces kluveri                    | GGGTGGACATG<br>CGTACTGTGAG<br>GTCT | Cohn, M., McEachern, M. J., & Blackburn, E. H. (1998). Telomeric sequence diversity within the genus Saccharomyces. Current genetics, 33(2), 83–91.                                                                                                     | yes | TCTGGGTGGAC<br>ATGCGTACTGT<br>GAGG | yes | CM000687.1;<br>CM000688.1;<br>CM000689.1;<br>CM000691.1                                     | 4/8 | 598 |
| Kluyveromyces lactis                     | ACGGATTTGATT<br>AGGTATGTGGT<br>GT  | McEachern, M. J., & Blackburn, E. H. (1994). A conserved sequence motif within the exceptionally diverse telomeric sequences of budding yeasts. Proceedings of the National Academy of Sciences of the United States of America, 91(8), 3453–3457.      | yes | TTAGGTATGTG<br>GTGTACGGATT<br>TGA  | yes | NC_006037.1;<br>NC_006038.1;<br>NC_006039.1;<br>NC_006040.1;<br>NC_006041.1;<br>NC_006042.1 | 6/7 | 708 |

|                          |                                   |                                                                                                                                                                                                                                                    |     |                                   |     |                                                                                                                                                                                                |       |     |
|--------------------------|-----------------------------------|----------------------------------------------------------------------------------------------------------------------------------------------------------------------------------------------------------------------------------------------------|-----|-----------------------------------|-----|------------------------------------------------------------------------------------------------------------------------------------------------------------------------------------------------|-------|-----|
| Candida albicans         | ACGGATGTCTA<br>ACTTCTGGTGT        | McEachern, M. J., & Blackburn, E. H. (1994). A conserved sequence motif within the exceptionally diverse telomeric sequences of budding yeasts. Proceedings of the National Academy of Sciences of the United States of America, 91(8), 3453–3457. | yes | TAAGGATGTCA<br>CGATCATTGGT<br>G   | yes | CP032017.1                                                                                                                                                                                     | 1/8   | 931 |
| Candida glabrata         | CTGGGTGCTGT<br>GGGGT              | McEachern, M. J., & Blackburn, E. H. (1994). A conserved sequence motif within the exceptionally diverse telomeric sequences of budding yeasts. Proceedings of the National Academy of Sciences of the United States of America, 91(8), 3453–3457. | yes | TCTGGGTGCTG<br>TGGGG              | yes | CP048234.1;<br>CP048230.1;<br>CP048240.1;<br>CP048241.1;<br>CP048236.1;<br>CP048235.1;<br>CP048232.1;<br>CP048238.1;<br>CP048233.1;<br>CP048237.1;<br>CP048231.1;<br>CP048239.1;<br>CP048242.1 | 13/13 | 817 |
| Candida orthopsilosis    | GGTTAGGATGT<br>AGACAATACTG<br>C   | Gunisova, S. (2009). Identification and comparative analysis of telomerase RNAs from Candida species reveal conservation of functional elements. RNA (New York, N.Y.), 15(4), 546–559.                                                             | yes | /                                 | /   | /                                                                                                                                                                                              | /     | /   |
| Candida pseudotropicalis | ACGGATTTGATT<br>AGTTATGTGGT<br>GT | McEachern, M. J., & Blackburn, E. H. (1994). A conserved sequence motif within the exceptionally diverse telomeric sequences of budding yeasts. Proceedings of the National Academy of Sciences of the United States of America, 91(8), 3453–3457. | yes | TACGGATTTGA<br>TTAGTTATGTG<br>GTG | yes | NC_036025.1;<br>NC_036026.1;<br>NC_036027.1;<br>NC_036028.1;<br>NC_036029.1;<br>NC_036030.1;<br>NC_036031.1;<br>NC_036032.1                                                                    | 8/9   | 750 |

|                                         |                                                                     |                                                                                                                                                                                                                                                                                                                                                                                                                                              |     |                                  |     |                                                                                                                             |     |     |
|-----------------------------------------|---------------------------------------------------------------------|----------------------------------------------------------------------------------------------------------------------------------------------------------------------------------------------------------------------------------------------------------------------------------------------------------------------------------------------------------------------------------------------------------------------------------------------|-----|----------------------------------|-----|-----------------------------------------------------------------------------------------------------------------------------|-----|-----|
| Candida tropicalis                      | A[C/A]GGATGTC<br>ACGATCATTGG<br>TGT;<br>AAGGATGTCAC<br>GATCATTGGTGT | Gunisova, S. (2009). Identification and comparative analysis of telomerase RNAs from Candida species reveal conservation of functional elements. RNA (New York, N.Y.), 15(4), 546–559.<br>McEachern, M. J., & Blackburn, E. H. (1994). A conserved sequence motif within the exceptionally diverse telomeric sequences of budding yeasts. Proceedings of the National Academy of Sciences of the United States of America, 91(8), 3453–3457. | yes | TAAGGATGTCA<br>CGATCATTGGT<br>G  | yes | CP047875.1;<br>CP047869.1;<br>CP047870.1;<br>CP047871.1;<br>CP047872.1;<br>CP047873.1;<br>CP047874.1                        | 7/7 | 199 |
| Debaryomyces hansenii                   | ATGTTGAGGTG<br>TAGGG                                                | Lépingle, A., Casaregola, S., Neuvéglise, C., Bon, E., Nguyen, H., Artiguenave, F., Wincker, P., & Gaillardin, C. (2000). Genomic exploration of the hemiascomycetous yeasts: 14. Debaryomyces hansenii var. hansenii. FEBS letters, 487(1), 82–86.                                                                                                                                                                                          | yes | TAGGGATGTTG<br>AGGTG             | yes | NC_006044.2;<br>NC_006048.2                                                                                                 | 2/8 | 315 |
| Ashbya gossypii (Eremothecium gossypii) | GTGTGGTGTAT<br>GGGTCTCTCAG<br>CG                                    | Dietrich, F. S., Voegeli, S. (2004). The Ashbya gossypii genome as a tool for mapping the ancient Saccharomyces cerevisiae genome. Science (New York, N.Y.), 304(5668), 304–307.                                                                                                                                                                                                                                                             | yes | TATGGGTCTCT<br>CAGCGGTGTG<br>GTG | yes | NC_005782.2;<br>NC_005783.5;<br>NC_005784.3;<br>NC_005785.6;<br>NC_005786.2;<br>NC_005787.5;<br>NC_005788.4                 | 7/8 | 672 |
| Pichia stipitis                         | GGATCTTTTCAC<br>GTCTTGCGGTA                                         | Jeffries, T. W., Grigoriev, I. V. (2007). Genome sequence of the lignocellulose-bioconverting and xylose-fermenting yeast Pichia stipitis. Nature biotechnology, 25(3), 319–326.                                                                                                                                                                                                                                                             | yes | GGATCTTTTCA<br>CGTCTTGCGGT<br>AT | yes | NC_009068.1;<br>NC_009042.1;<br>NC_009043.1;<br>NC_009044.1;<br>NC_009045.1;<br>NC_009046.1;<br>NC_009047.1;<br>NC_009048.1 | 8/8 | 558 |
| Yarrowia lipolytica                     | GGACGATTG                                                           | Teixeira, M. T., & Gilson, E. (2005). Telomere maintenance, function and evolution: the yeast paradigm. Chromosome research : an international journal on the molecular, supramolecular and evolutionary aspects of chromosome biology, 13(5), 535–548.                                                                                                                                                                                      | yes | TCAGGGTTAG                       | no  | CP061012.1;<br>CP061014.1;<br>CP061015.1;<br>CP061016.1;<br>CP061017.1                                                      | 5/7 | 663 |

|                                            |                           |                                                                                                                                                                                                                                                         |     |                            |     |                                                                                                                             |     |     |
|--------------------------------------------|---------------------------|---------------------------------------------------------------------------------------------------------------------------------------------------------------------------------------------------------------------------------------------------------|-----|----------------------------|-----|-----------------------------------------------------------------------------------------------------------------------------|-----|-----|
| Clavispora lusitaniae                      | TCTTTAGGGAG<br>GTACTGATGT | Gunisova, S. (2009). Identification and comparative analysis of telomerase RNAs from Candida species reveal conservation of functional elements. RNA (New York, N.Y.), 15(4), 546–559.                                                                  | yes | TTAGGGGAGGT<br>ACTGATGTTTC | yes | CP038484.1;<br>CP038485.1;<br>CP038486.1;<br>CP038487.1;<br>CP038490.1                                                      | 5/8 | 396 |
| Aspergillus fumigatus                      | TTAGGG                    | Nierman, W. C. (2005). Genomic sequence of the pathogenic and allergenic filamentous fungus Aspergillus fumigatus. Nature, 438(7071), 1151–1156.                                                                                                        | yes | TTAGGG                     | yes | NC_007194.1;<br>NC_007195.1;<br>NC_007196.1;<br>NC_007197.1;<br>NC_007198.1;<br>NC_007199.1;<br>NC_007200.1;<br>NC_007201.1 | 8/8 | 112 |
| Aspergillus oryzae                         | TTAGGGTCAAC<br>A          | Kusumoto, K. I., Suzuki, S., & Kashiwagi, Y. (2003). Telomeric repeat sequence of Aspergillus oryzae consists of dodeca-nucleotides. Applied microbiology and biotechnology, 61(3), 247–251.                                                            | yes | TTAGGGTCAAC<br>A           | yes | NC_036435.1;<br>NC_036439.1;<br>NC_036441.1;<br>NC_036438.1;<br>NC_036442.1                                                 | 5/9 | 98  |
| Aspergillus nidulans (Emericella nidulans) | TTAGGG                    | Bhattacharyya, A., & Blackburn, E. H. (1997). Aspergillus nidulans maintains short telomeres throughout development. Nucleic acids research, 25(7), 1426–1431.                                                                                          | yes | TTAGGG                     | yes | BN001302.1;<br>BN001306.1;<br>BN001307.1;<br>BN001305.1;<br>BN001308.1                                                      | 5/8 | 157 |
| Histoplasma capsulatum                     | TTAGGG                    | Woods, J. P., & Goldman, W. E. (1992). In vivo generation of linear plasmids with addition of telomeric sequences by Histoplasma capsulatum. Molecular microbiology, 6(23), 3603–3610.                                                                  | yes | TTAGGG                     | yes | CP069114.1;<br>CP069109.1;<br>CP069110.1;<br>CP069111.1;<br>CP069116.1;<br>CP069112.1                                       | 6/8 | 198 |
| Magnaporthe grisea (rice blast fungus)     | TTAGGG                    | Teixeira, M. T., & Gilson, E. (2005). Telomere maintenance, function and evolution: the yeast paradigm. Chromosome research : an international journal on the molecular, supramolecular and evolutionary aspects of chromosome biology, 13(5), 535–548. | yes | TTAGGG                     | yes | NC_044975.1                                                                                                                 | 1/3 | 105 |

|        |                                                     |                                                                   |                                                                                                                                                                                                                                                                          |     |            |     |                                                                                                                                                                                                                             |       |     |
|--------|-----------------------------------------------------|-------------------------------------------------------------------|--------------------------------------------------------------------------------------------------------------------------------------------------------------------------------------------------------------------------------------------------------------------------|-----|------------|-----|-----------------------------------------------------------------------------------------------------------------------------------------------------------------------------------------------------------------------------|-------|-----|
|        | Podospora anserina                                  | TTAGGG                                                            | Javerzat, J. P., Bhattacharjee, V., & Barreau, C. (1993). Isolation of telomeric DNA from the filamentous fungus Podospora anserina and construction of a self-replicating linear plasmid showing high transformation frequency. Nucleic acids research, 21(3), 497–504. | yes | TTAGGG     | yes | CM030332.1;<br>CM030333.1;<br>CM030335.1;<br>CM030337.1                                                                                                                                                                     | 4/8   | 120 |
|        | Neurospora crassa                                   | TTAGGG                                                            | Schechtman M. G. (1990). Characterization of telomere DNA from Neurospora crassa. Gene, 88(2), 159–165.                                                                                                                                                                  | yes | TTAGGG     | yes | NC_026502.1;<br>NC_026503.1;<br>NC_026504.1;<br>NC_026505.1;<br>NC_026506.1;<br>NC_026507.1;<br>NC_026501.1                                                                                                                 | 7/8   | 309 |
|        | Cryptococcus neoformans (Filobasidiella neoformans) | TTA(G)4-6                                                         | Edman J. C. (1992). Isolation of telomere-like sequences from Cryptococcus neoformans and their use in high-efficiency transformation. Molecular and cellular biology, 12(6), 2777–2783.                                                                                 | yes | TTAGGGGG   | yes | NC_006684.1;<br>NC_006686.1;<br>NC_006691.1;<br>NC_006692.1;<br>NC_006693.1;<br>NC_006694.1;<br>NC_006679.1;<br>NC_006680.1;<br>NC_006681.1;<br>NC_006682.1;<br>NC_006683.1;<br>NC_006670.1;<br>NC_006685.1;<br>NC_006687.1 | 14/14 | 93  |
|        | Encephalitozoon cuniculi                            | G[A/G]GCCT[C/T] CT;<br>GAGCCTTGTTT;<br>GAGACGCAGTG<br>TTGCCAGGATG | Peyret, P., Katinka, M. D. (2001). Sequence and analysis of chromosome I of the amitochondriate intracellular parasite Encephalitozoon cuniculi (Microspora). Genome research, 11(2), 198–207.                                                                           | yes | GGTTATGTGT | no  | NC_003242.2                                                                                                                                                                                                                 | 1/11  | 70  |
| Amoeba | Dictyostelium discoideum                            | A(G)1-8                                                           | Emery, H. S., & Weiner, A. M. (1981). An irregular satellite sequence is found at the termini of the linear extrachromosomal rDNA in Dictyostelium discoideum. Cell, 26(3 Pt 1), 411–419.                                                                                | yes | /          | /   | /                                                                                                                                                                                                                           | /     | /   |

|                |                                        |             |                                                                                                                                                                                                                               |     |             |     |                                                                                                                                                                                                             |       |       |
|----------------|----------------------------------------|-------------|-------------------------------------------------------------------------------------------------------------------------------------------------------------------------------------------------------------------------------|-----|-------------|-----|-------------------------------------------------------------------------------------------------------------------------------------------------------------------------------------------------------------|-------|-------|
| Plants         | Solanum lycopersicum (tomato)          | TT[T/A]GGG  | Ganal, M. W., Lapitan, N. L., & Tanksley, S. D. (1991). Macrostructure of the tomato telomeres. <i>The Plant cell</i> , 3(1), 87–94.                                                                                          | yes | TTTAGGG     | yes | OU640346.1;<br>OU640347.1;<br>OU640349.1;<br>OU640351.1;<br>OU640353.1;<br>OU640354.1;<br>OU640344.1;<br>OU640345.1;<br>OU640352.1                                                                          | 9/12  | 48474 |
|                | Arabidopsis thaliana (thale cress)     | TTTAGGG     | Richards, E. J., & Ausubel, F. M. (1988). Isolation of a higher eukaryotic telomere from <i>Arabidopsis thaliana</i> . <i>Cell</i> , 53(1), 127–136.                                                                          | yes | TTTAGGG     | yes | CP087126.2;<br>CP087127.2;<br>CP087128.1;<br>CP087129.2;<br>CP087130.2                                                                                                                                      | 5/5   | 4480  |
| Other Protists | Plasmodium falciparum (human parasite) | TT[T/C]AGGG | Vernick, K. D., & McCutchan, T. F. (1988). Sequence and structure of a <i>Plasmodium falciparum</i> telomere. <i>Molecular and biochemical parasitology</i> , 28(2), 85–94.                                                   | yes | TT[T/C]AGGG | yes | NC_004325.2;<br>NC_037280.1;<br>NC_000521.4;<br>NC_004318.2;<br>NC_004326.2;<br>NC_004327.3;<br>NC_004328.3;<br>NC_004329.3;<br>NC_004330.2;<br>NC_037281.1;<br>NC_037282.1;<br>NC_004331.3;<br>NC_037283.1 | 13/15 | 4731  |
|                | Plasmodium berghei (rodent parasite)   | TT[T/C]AGGG | Ponzi, M., Pace, T., Dore, E., & Frontali, C. (1985). Identification of a telomeric DNA sequence in <i>Plasmodium berghei</i> . <i>The EMBO journal</i> , 4(11), 2991–2995.                                                   | yes | TT[T/C]AGGG | yes | NC_036159.2;<br>NC_036160.2;<br>NC_036161.2;<br>NC_036162.2;<br>NC_036163.2;<br>NC_036166.2;<br>NC_036168.2;<br>NC_036169.2                                                                                 | 8/16  | 732   |
|                | Theileria annulata                     | TTTTAGGG    | Sohanpal, B. K., Morzaria, S. P., Gobright, E. I., & Bishop, R. P. (1995). Characterisation of the telomeres at opposite ends of a 3 Mb <i>Theileria parva</i> chromosome. <i>Nucleic acids research</i> , 23(11), 1942–1947. | yes | TTTAGGG     | no  | NC_011100.1;<br>NC_011098.1;<br>NC_011129.2                                                                                                                                                                 | 3/4   | 1154  |



|  |                        |        |                                                                                                                                                                                                            |     |        |     |                                                                                                                                                                                                                                                                                                                                                                                                                                                                                              |       |      |
|--|------------------------|--------|------------------------------------------------------------------------------------------------------------------------------------------------------------------------------------------------------------|-----|--------|-----|----------------------------------------------------------------------------------------------------------------------------------------------------------------------------------------------------------------------------------------------------------------------------------------------------------------------------------------------------------------------------------------------------------------------------------------------------------------------------------------------|-------|------|
|  | Cryptosporidium parvum | TTTAGG | Liu, C., Schroeder, A. A., Kapur, V., & Abrahamsen, M. S. (1998). Telomeric sequences of Cryptosporidium parvum. Molecular and biochemical parasitology, 94(2), 291–296.                                   | yes | TTTAGG | yes | NC_006981.1;<br>NC_006982.1;<br>NC_006983.1;<br>NC_006984.1;<br>NC_006985.1                                                                                                                                                                                                                                                                                                                                                                                                                  | 5/8   | 2647 |
|  | Giardia lamblia        | TTAGG  | Morrison, H. G., McArthur, A. G., Gillin, F. D. (2007). Genomic minimalism in the early diverging intestinal parasite Giardia lamblia. Science (New York, N.Y.), 317(5846), 1921–1926.                     | yes | TAGGG  | no  | NC_051856.1;<br>NC_051858.1;<br>NC_051859.1                                                                                                                                                                                                                                                                                                                                                                                                                                                  | 3/5   | 1772 |
|  | Giardia intestinalis   | TAGGG  | Le Blancq, S. M., Kase, R. S., & Van der Ploeg, L. H. (1991). Analysis of a Giardia lamblia rRNA encoding telomere with [TAGGG] <sub>n</sub> as the telomere repeat. Nucleic acids research, 19(20), 5790. | yes | TAGGG  | yes | NC_051856.1;<br>NC_051858.1;<br>NC_051859.1                                                                                                                                                                                                                                                                                                                                                                                                                                                  | 3/5   | 1772 |
|  | Leishmania major       | TTAGGG | Teixeira, M.T., and Gilson, E. (2005). Telomere maintenance, function and evolution: the yeast paradigm. Chromosome Res 13, 535–548. 10.1007/s10577-005-0999-0.                                            | yes | TTAGGG | yes | NC_004916.2;<br>NC_007245.2;<br>NC_007246.2;<br>NC_007247.2;<br>NC_007248.2;<br>NC_007250.2;<br>NC_007251.2;<br>NC_007252.2;<br>NC_007253.2;<br>NC_007254.2;<br>NC_007255.2;<br>NC_007256.2;<br>NC_007257.2;<br>NC_007258.2;<br>NC_007259.2;<br>NC_007260.2;<br>NC_007261.2;<br>NC_007262.2;<br>NC_007263.2;<br>NC_007264.2;<br>NC_007265.2;<br>NC_007266.2;<br>NC_007267.2;<br>NC_007268.2;<br>NC_007269.2;<br>NC_007270.2;<br>NC_007271.2;<br>NC_007272.2;<br>NC_007273.2;<br>NC_007285.2; | 33/36 | 1321 |

|  |                       |        |                                                                                                                                               |     |        |     |                                             |      |     |
|--|-----------------------|--------|-----------------------------------------------------------------------------------------------------------------------------------------------|-----|--------|-----|---------------------------------------------|------|-----|
|  |                       |        |                                                                                                                                               |     |        |     | NC_007286.2;<br>NC_007284.2;<br>NC_007287.2 |      |     |
|  | Trypanosoma<br>brucei | TTAGGG | Blackburn, E. H., & Challoner, P. B.<br>(1984). Identification of a telomeric<br>DNA sequence in Trypanosoma<br>brucei. Cell, 36(2), 447–457. | yes | TTAGGG | yes | NC_008409.1;<br>NC_007283.1                 | 2/10 | 482 |

Table S2: Detect telomeric motif sequence of fungi by TelFinder

| species               | abbr. | motif  | len | subphylum      | IFdetection | chr with telomere                                                                                                                                                                                                                                                                                                                                                                                                          | telchrN/allchrN | max Tellen |
|-----------------------|-------|--------|-----|----------------|-------------|----------------------------------------------------------------------------------------------------------------------------------------------------------------------------------------------------------------------------------------------------------------------------------------------------------------------------------------------------------------------------------------------------------------------------|-----------------|------------|
| Peltaster fruticola   | PFA   | TAGGG  | 5   | Pezizomycotina | yes         | CP051139.1;CP051140.1;<br>CP051141.1;CP051142.1;<br>CP051143.1                                                                                                                                                                                                                                                                                                                                                             | 5/5             | 119        |
| Zymoseptoria tritici  | ZTR   | TTAGGG | 6   | Pezizomycotina | yes         | CM009548.1;CM009544.1;<br>CM009545.1;CM009546.1;<br>CM009541.1;CM009552.1;<br>CM009550.1;CM009539.1;<br>CM009551.1;CM009554.1;<br>CM009547.1;CM009542.1;<br>CM009553.1;CM009556.1;<br>CM009540.1;CM009549.1;<br>CM009543.1;CM009555.1                                                                                                                                                                                      | 18/18           | 270        |
| Cercospora sojina     | CSO   | /      | 0   | Pezizomycotina | no          | /                                                                                                                                                                                                                                                                                                                                                                                                                          | /               | /          |
| Cercospora beticola   | CBT   | /      | 0   | Pezizomycotina | no          | /                                                                                                                                                                                                                                                                                                                                                                                                                          | /               | /          |
| Venturia effusa       | VEF   | TTAGGG | 6   | Pezizomycotina | yes         | CP042199.1;CP042187.1;<br>CP042204.1;CP042192.1;<br>CP042185.1;CP042188.1;<br>CP042194.1;CP042190.1;<br>CP042195.1;CP042196.1;<br>CP042191.1;CP042189.1;<br>CP042203.1;CP042193.1;<br>CP042198.1;CP042200.1;<br>CP042201.1;CP042202.1;<br>CP042197.1;CP042186.1<br>CM017824.1;CM017827.1;<br>CM017826.1;CM017821.1;<br>CM017831.1;CM017825.1;<br>CM017829.1;CM017822.1;<br>CM017830.1;CM017820.1;<br>CM017828.1;CM017823.1 | 20/21           | 168        |
| Pyrenophora teres     | PTE   | TTAGGG | 6   | Pezizomycotina | yes         | CM018003.1;CM018017.1<br>CP022024.1;CP022025.1;<br>CP022026.1;CP022027.1;                                                                                                                                                                                                                                                                                                                                                  | 12/12           | 144        |
| Bipolaris sorokiniana | BSC   | TTAGGG | 6   | Pezizomycotina | yes         | CP022028.1;CP022029.1;<br>CP022030.1;CP022031.1;<br>CP022032.1;CP022033.1<br>CM016504.1;CM016505.1;<br>CM016506.1;CM016507.1;<br>CM016508.1;CM016509.1;<br>CM016510.1;CM016511.1;<br>CM016512.1;CM016513.1                                                                                                                                                                                                                 | 2/16            | 30         |
| Alternaria solani     | ASL   | TTAGGG | 6   | Pezizomycotina | yes         | CP022028.1;CP022029.1;<br>CP022030.1;CP022031.1;<br>CP022032.1;CP022033.1<br>CM016504.1;CM016505.1;<br>CM016506.1;CM016507.1;<br>CM016508.1;CM016509.1;<br>CM016510.1;CM016511.1;<br>CM016512.1;CM016513.1                                                                                                                                                                                                                 | 10/10           | 126        |
| Alternaria brassicae  | ABR   | TAAGGG | 6   | Pezizomycotina | yes         | CM016504.1;CM016505.1;<br>CM016506.1;CM016507.1;<br>CM016508.1;CM016509.1;<br>CM016510.1;CM016511.1;<br>CM016512.1;CM016513.1                                                                                                                                                                                                                                                                                              | 10/10           | 150        |

|                             |     |                  |    |                |     |                                                                                                                                                                                                                                                                                                                                                                                                                                                                                                                                                                                                   |       |     |
|-----------------------------|-----|------------------|----|----------------|-----|---------------------------------------------------------------------------------------------------------------------------------------------------------------------------------------------------------------------------------------------------------------------------------------------------------------------------------------------------------------------------------------------------------------------------------------------------------------------------------------------------------------------------------------------------------------------------------------------------|-------|-----|
| Parastagonospora nodorum    | PNO | TTAGGG           | 6  | Pezizomycotina | yes | CP022852.1;CP022853.1;<br>CP022855.1;CP022854.1;<br>CP022856.1;CP022858.1;<br>CP022857.1;CP022860.1;<br>CP022859.1;CP022861.1;<br>CP022863.1;CP022862.1;<br>CP022865.1;CP022864.1;<br>CP022868.1;CP022866.1;<br>CP022870.1;CP022873.1;<br>CP022871.1;CP022867.1<br>LR026984.1;LR026986.1;<br>LR026988.1;LR026989.1;<br>LR026991.1;LR026992.1;<br>LR026993.1                                                                                                                                                                                                                                       | 22/22 | 317 |
| Blumeria graminis           | BGT | TTAGGG           | 6  | Pezizomycotina | yes | NC_037312.1;NC_037316.1;<br>NC_037322.1;NC_037320.1;<br>NC_037325.1;NC_037311.1;<br>NC_037317.1;NC_037321.1;<br>NC_037324.1;NC_037315.1;<br>NC_037318.1;NC_037310.1;<br>NC_037323.1;NC_037313.1;<br>NC_037319.1;NC_037327.1;<br>NC_037326.1<br>CP017828.1;CP017815.1;<br>CP017822.1;CP017818.1;<br>CP017823.1;CP017829.1;<br>CP017827.1;CP017825.1;<br>CP017817.1;CP017821.1;<br>CP017814.1;CP017819.1;<br>CP017820.1;CP017816.1<br>NC_043742.1;NC_043743.1;<br>NC_043744.1<br>CP050920.1;CP050921.1;<br>CP050922.1;CP050923.1;<br>CP050924.1;CP050925.1;<br>CP050926.1;CP050927.1;<br>CP050928.1 | 7/12  | 421 |
| Botrytis cinerea            | BFU | TTAGGG           | 6  | Pezizomycotina | yes | NC_037312.1;NC_037316.1;<br>NC_037322.1;NC_037320.1;<br>NC_037325.1;NC_037311.1;<br>NC_037317.1;NC_037321.1;<br>NC_037324.1;NC_037315.1;<br>NC_037318.1;NC_037310.1;<br>NC_037323.1;NC_037313.1;<br>NC_037319.1;NC_037327.1;<br>NC_037326.1<br>CP017828.1;CP017815.1;<br>CP017822.1;CP017818.1;<br>CP017823.1;CP017829.1;<br>CP017827.1;CP017825.1;<br>CP017817.1;CP017821.1;<br>CP017814.1;CP017819.1;<br>CP017820.1;CP017816.1<br>NC_043742.1;NC_043743.1;<br>NC_043744.1<br>CP050920.1;CP050921.1;<br>CP050922.1;CP050923.1;<br>CP050924.1;CP050925.1;<br>CP050926.1;CP050927.1;<br>CP050928.1 | 17/18 | 129 |
| Sclerotinia sclerotiorum    | SSL | TTAGGG           | 6  | Pezizomycotina | yes | NC_043742.1;NC_043743.1;<br>NC_043744.1<br>CP050920.1;CP050921.1;<br>CP050922.1;CP050923.1;<br>CP050924.1;CP050925.1;<br>CP050926.1;CP050927.1;<br>CP050928.1                                                                                                                                                                                                                                                                                                                                                                                                                                     | 14/16 | 195 |
| Pyricularia pennisetigena   | PPE | TTAGGG           | 6  | Pezizomycotina | yes | NC_043742.1;NC_043743.1;<br>NC_043744.1<br>CP050920.1;CP050921.1;<br>CP050922.1;CP050923.1;<br>CP050924.1;CP050925.1;<br>CP050926.1;CP050927.1;<br>CP050928.1                                                                                                                                                                                                                                                                                                                                                                                                                                     | 3/5   | 102 |
| Pyricularia oryzae          | POR | TTAGGG           | 6  | Pezizomycotina | yes | NC_043742.1;NC_043743.1;<br>NC_043744.1<br>CP050920.1;CP050921.1;<br>CP050922.1;CP050923.1;<br>CP050924.1;CP050925.1;<br>CP050926.1;CP050927.1;<br>CP050928.1                                                                                                                                                                                                                                                                                                                                                                                                                                     | 9/9   | 196 |
| Pyricularia grisea          | PGR | TTAGGG           | 6  | Pezizomycotina | yes | NC_044975.1                                                                                                                                                                                                                                                                                                                                                                                                                                                                                                                                                                                       | 1/3   | 114 |
| Valsa mali                  | VMA | TTAGGG           | 6  | Pezizomycotina | yes | CM003098.1;CM003099.1;<br>CM003105.1<br>NC_030954.1;NC_030955.1;<br>NC_030956.1;NC_030957.1;<br>NC_030958.1;NC_030959.1                                                                                                                                                                                                                                                                                                                                                                                                                                                                           | 3/13  | 150 |
| Colletotrichum higginsianum | COI | TTAGGG           | 6  | Pezizomycotina | yes | NC_030954.1;NC_030955.1;<br>NC_030956.1;NC_030957.1;<br>NC_030958.1;NC_030959.1                                                                                                                                                                                                                                                                                                                                                                                                                                                                                                                   | 6/6   | 138 |
| Verticillium dahliae        | VDA | TTAGGG           | 6  | Pezizomycotina | yes | CM014044.1                                                                                                                                                                                                                                                                                                                                                                                                                                                                                                                                                                                        | 1/8   | 459 |
| Drechmeria coniospora       | DCO | CCGTTGCTGT<br>TG | 12 | Pezizomycotina | yes | CM004174.1;CM004175.1;<br>CM004176.1                                                                                                                                                                                                                                                                                                                                                                                                                                                                                                                                                              | 3/3   | 333 |

|                                       |     |        |   |                |     |                                                                                                                                                                                                               |       |     |
|---------------------------------------|-----|--------|---|----------------|-----|---------------------------------------------------------------------------------------------------------------------------------------------------------------------------------------------------------------|-------|-----|
| <i>Cordyceps militaris</i>            | CMT | TTAGGG | 6 | Pezizomycotina | yes | CP023328.1;CP023327.1;<br>CP023326.1;CP023322.1;<br>CP023325.1;CP023323.1;<br>CP023324.1                                                                                                                      | 7/7   | 156 |
| <i>Trichoderma reesei</i>             | TRE | TTAGGG | 6 | Pezizomycotina | yes | CP021297.1;CP021298.1;<br>CP021299.1;CP021300.1;<br>CP021301.1;CP021302.1<br>CP058932.1;CP058933.1;<br>CP058934.1;CP058935.1;<br>CP058936.1;CP058937.1;<br>CP058938.1                                         | 6/7   | 94  |
| <i>Metarhizium brunneum</i>           | MBR | TTAGGG | 6 | Pezizomycotina | yes | NC_035790.1;NC_035793.1;<br>NC_035794.1;NC_035795.1;<br>NC_035796.1<br>CP031385.1;CP031386.1;<br>CP031387.1;CP031388.1;<br>CP031389.1;CP031390.1;<br>CP031391.1                                               | 7/8   | 150 |
| <i>Pochonia chlamydosporia</i>        | PCH | TTAGGG | 6 | Pezizomycotina | yes | NC_031951.1;NC_031952.1;<br>NC_031954.1                                                                                                                                                                       | 5/7   | 156 |
| <i>Epichloe festucae</i>              | EFE | TTAGGG | 6 | Pezizomycotina | yes | NC_038012.1;NC_038013.1;<br>NC_038014.1;NC_038015.1                                                                                                                                                           | 7/8   | 228 |
| <i>Fusarium verticillioides</i>       | FVR | /      | 0 | Pezizomycotina | no  | /                                                                                                                                                                                                             | /     | /   |
| <i>Fusarium pseudograminearum</i>     | FPU | TTAGGG | 6 | Pezizomycotina | yes | HG970332.2;HG970333.2;<br>HG970334.2;HG970335.2<br>CP064747.1;CP064748.1;<br>CP064749.1;CP064750.1                                                                                                            | 3/4   | 102 |
| <i>Fusarium venenatum</i>             | FVE | TTAGGG | 6 | Pezizomycotina | yes | NC_031000.1;NC_030990.1<br>NC_016457.1;NC_016458.1;<br>NC_016459.1;NC_016460.1;<br>NC_016461.1;NC_016462.1<br>NC_016472.1;NC_016473.1;<br>NC_016474.1;NC_016475.1;<br>NC_016476.1;NC_016477.1;<br>NC_016478.1 | 4/5   | 156 |
| <i>Fusarium circinatum</i>            | FCI | /      | 0 | Pezizomycotina | no  | /                                                                                                                                                                                                             | /     | /   |
| <i>Fusarium graminearum</i>           | FGR | TTAGGG | 6 | Pezizomycotina | yes | NC_026501.1;NC_026502.1;<br>NC_026503.1;NC_026504.1;<br>NC_026505.1;NC_026506.1;<br>NC_026507.1                                                                                                               | 4/6   | 144 |
| <i>Fusarium culmorum</i>              | FCU | TTAGGG | 6 | Pezizomycotina | yes | CP034370.1;CP034371.1;<br>CP034372.1;CP034373.1;<br>CP034374.1;CP034375.1;<br>CP034377.1;CP034378.1;<br>CP034379.1;CP034380.1;<br>CP034381.1;CP034376.1                                                       | 4/6   | 276 |
| <i>Fusarium oxysporum</i>             | FOX | TTAGGG | 6 | Pezizomycotina | yes | NC_031000.1;NC_030990.1<br>NC_016457.1;NC_016458.1;<br>NC_016459.1;NC_016460.1;<br>NC_016461.1;NC_016462.1<br>NC_016472.1;NC_016473.1;<br>NC_016474.1;NC_016475.1;<br>NC_016476.1;NC_016477.1;<br>NC_016478.1 | 2/15  | 168 |
| <i>Thermothielavioides terrestris</i> | TTT | TTAGGG | 6 | Pezizomycotina | yes | NC_026501.1;NC_026502.1;<br>NC_026503.1;NC_026504.1;<br>NC_026505.1;NC_026506.1;<br>NC_026507.1                                                                                                               | 6/6   | 315 |
| <i>Thermothelomyces thermophilus</i>  | TTH | TTAGGG | 6 | Pezizomycotina | yes | CP034370.1;CP034371.1;<br>CP034372.1;CP034373.1;<br>CP034374.1;CP034375.1;<br>CP034377.1;CP034378.1;<br>CP034379.1;CP034380.1;<br>CP034381.1;CP034376.1                                                       | 7/7   | 193 |
| <i>Podospora comata</i>               | PCO | /      | 0 | Pezizomycotina | no  | /                                                                                                                                                                                                             | /     | /   |
| <i>Neurospora crassa</i>              | NCR | TTAGGG | 6 | Pezizomycotina | yes | NC_026501.1;NC_026502.1;<br>NC_026503.1;NC_026504.1;<br>NC_026505.1;NC_026506.1;<br>NC_026507.1                                                                                                               | 7/8   | 312 |
| <i>Exophiala lecanii-corni</i>        | ELC | TTAGGG | 6 | Pezizomycotina | yes | CP034370.1;CP034371.1;<br>CP034372.1;CP034373.1;<br>CP034374.1;CP034375.1;<br>CP034377.1;CP034378.1;<br>CP034379.1;CP034380.1;<br>CP034381.1;CP034376.1                                                       | 12/13 | 92  |

|                            |     |                               |    |                  |     |                                                                                                                                                                               |      |     |
|----------------------------|-----|-------------------------------|----|------------------|-----|-------------------------------------------------------------------------------------------------------------------------------------------------------------------------------|------|-----|
| Talaromyces pinophilus     | TPI | TTAGGG                        | 6  | Pezizomycotina   | yes | CP017344.1;CP017345.1;<br>CP017346.1;CP017347.1;<br>CP017348.1;CP017349.1;<br>CP017350.1;CP017351.1                                                                           | 8/9  | 141 |
| Talaromyces rugulosus      | TRU | TTAGGG                        | 6  | Pezizomycotina   | yes | NC_049561.1;NC_049562.1;<br>NC_049563.1;NC_049564.1;<br>NC_049565.1;NC_049566.1<br>CP015868.1;CP015869.1;<br>CP015871.1;CP015872.1;<br>CP015873.1;CP015875.1                  | 6/6  | 180 |
| Talaromyces marneffei      | TMF | TTAGG[G,A]                    | 10 | Pezizomycotina   | yes | CP036227.1;CP036228.1;<br>CP036229.1;CP036231.1;<br>CP036232.1                                                                                                                | 6/8  | 800 |
| Talaromyces funiculosus    | TFU | TTAGGG                        | 6  | Pezizomycotina   | yes | CM024080.1;CM024081.1;<br>CM024082.1                                                                                                                                          | 5/21 | 126 |
| Penicillium polonicum      | PPO | TTTAGGG                       | 7  | Pezizomycotina   | yes | /                                                                                                                                                                             | 3/4  | 182 |
| Monascus purpureus         | MPU | /                             | 0  | Pezizomycotina   | no  | /                                                                                                                                                                             | /    | /   |
| Aspergillus fumigatus      | AFM | TTAGGG                        | 6  | Pezizomycotina   | yes | NC_007194.1;NC_007195.1;<br>NC_007196.1;NC_007197.1;<br>NC_007198.1;NC_007199.1;<br>NC_007200.1;NC_007201.1<br>BN001302.1;BN001305.1;<br>BN001306.1;BN001307.1;<br>BN001308.1 | 8/8  | 119 |
| Aspergillus nidulans       | ANI | TTAGGG                        | 6  | Pezizomycotina   | yes | CP035525.1;CP035526.1;<br>CP035527.1;CP035530.1<br>CP051028.1;CP051029.1;<br>CP051030.1;CP051032.1;<br>CP051033.1;CP051034.1                                                  | 5/8  | 230 |
| Aspergillus sojae          | ASO | TTAGGGTCAA<br>CA              | 12 | Pezizomycotina   | yes | NC_036435.1;NC_036438.1;<br>NC_036439.1;NC_036441.1;<br>NC_036442.1<br>CP061804.1;CP061805.1;<br>CP061806.1;CP061807.1;<br>CP061809.1;CP061810.1                              | 4/8  | 150 |
| Aspergillus parasiticus    | APA | TTAGGGTCAA<br>CA              | 12 | Pezizomycotina   | yes | /                                                                                                                                                                             | 6/8  | 85  |
| Aspergillus oryzae         | AOR | TTAGGGTCAA<br>CA              | 12 | Pezizomycotina   | yes | LS992270.1<br>CP060360.1;CP060361.1;<br>CP060362.1;CP060363.1;<br>CP060364.1;CP060365.1;<br>CP060366.1                                                                        | 5/9  | 89  |
| Aspergillus flavus         | AFV | TTAGGGTCAA<br>CA              | 12 | Pezizomycotina   | yes | LT635756.1;LT635757.1;<br>LT635758.1;LT635759.1;<br>LT635760.1;LT635761.1;<br>LT635762.1                                                                                      | 6/9  | 260 |
| Sugiyamaella lignohabitans | SLB | /                             | 0  | Saccharomycotina | no  | /                                                                                                                                                                             | /    | /   |
| [Candida] hispaniensis     | CHI | TTGACGAGAG                    | 10 | Saccharomycotina | yes | CP038484.1;CP038485.1;<br>CP038486.1;CP038487.1;<br>CP038489.1;CP038490.1;<br>CP038491.1;CP038488.1                                                                           | 1/6  | 207 |
| [Candida] auris            | CAU | TTAGGTGGTG<br>TCTGGTTTC       | 20 | Saccharomycotina | yes | /                                                                                                                                                                             | 6/7  | 397 |
| [Candida] intermedia       | CIN | TTAGGGAGGT<br>AGAGGTTTT<br>C  | 21 | Saccharomycotina | yes | /                                                                                                                                                                             | 7/8  | 400 |
| Clavispora lusitaniae      | CLU | TTAGGGAGGT<br>ACTGATGTTC<br>T | 21 | Saccharomycotina | yes | /                                                                                                                                                                             | 8/8  | 396 |

|                                |     |                                       |    |                  |     |                                                                                                             |     |     |
|--------------------------------|-----|---------------------------------------|----|------------------|-----|-------------------------------------------------------------------------------------------------------------|-----|-----|
| Metschnikowia aff. pulcherrima | MAP | TTAGGGAGGT<br>ACGGGTGTCT<br>TAGCATC   | 27 | Saccharomycotina | yes | CP034456.1;CP034457.1;<br>CP034458.1                                                                        | 3/7 | 343 |
| Metschnikowia reukauffii       | MRE | TTAGGGATGT<br>ACTGATTAT<br>C          | 21 | Saccharomycotina | yes | CM010597.1;CM010598.1;<br>CM010604.1                                                                        | 3/9 | 406 |
| Yarrowia lipolytica            | YLI | TTAGTCAGGG                            | 10 | Saccharomycotina | yes | CP061012.1;CP061014.1;<br>CP061015.1;CP061016.1;<br>CP061017.1                                              | 5/7 | 663 |
| Saccharomycopsis malanga       | SMA | TAAGGGTGTC<br>AGTGGGG                 | 17 | Saccharomycotina | yes | CP025321.1;CP025322.1;<br>CP025323.1;CP025324.1;<br>CP025325.1;CP025326.1                                   | 6/7 | 227 |
| Saccharomycopsis fibuligera    | SFI | TAAGGGTGGT<br>G                       | 11 | Saccharomycotina | yes | CP015978.1;CP015983.1;<br>CP015984.1                                                                        | 3/7 | 146 |
| Hyphopichia pseudoburtonii     | HPS | TACGGGTCTT<br>TTCTACGAGG<br>GTGAGGAGG | 29 | Saccharomycotina | yes | CP024751.1;CP024752.1;<br>CP024753.1;CP024754.1;<br>CP024755.1;CP024756.1;<br>CP024757.1;CP024758.1         | 8/8 | 816 |
| Hyphopichia burtonii           | HBU | /                                     | 0  | Saccharomycotina | no  | /                                                                                                           | /   | /   |
| Candida orthopsilosis          | COT | /                                     | 0  | Saccharomycotina | no  | /                                                                                                           | /   | /   |
| Candida dubliniensis           | CDU | TACGGATGTC<br>TAACTTCTGG<br>TG        | 22 | Saccharomycotina | yes | NC_012867.1                                                                                                 | 1/8 | 254 |
| Candida tropicalis             | CTP | TAAGGATGTC<br>ACGATCATTG<br>GTG       | 23 | Saccharomycotina | yes | CP047869.1;CP047870.1;<br>CP047871.1;CP047872.1;<br>CP047873.1;CP047874.1;<br>CP047875.1                    | 7/7 | 199 |
| Candida albicans               | CAL | TAAGGATGTC<br>ACGATCATTG<br>GTG       | 23 | Saccharomycotina | yes | CP032017.1                                                                                                  | 1/8 | 931 |
| Debaryomyces hansenii          | DHA | TAGGGATGTT<br>GAGGTG                  | 16 | Saccharomycotina | yes | NC_006044.2;NC_006048.2                                                                                     | 2/8 | 315 |
| Scheffersomyces stipitis       | SST | TATGGATCTT<br>TTCACGTCTT<br>GCGG      | 24 | Saccharomycotina | yes | NC_009068.1;NC_009042.1;<br>NC_009043.1;NC_009044.1;<br>NC_009045.1;NC_009046.1;<br>NC_009047.1;NC_009048.1 | 8/8 | 558 |
| Millerozyma farinosa           | MFA | /                                     | 0  | Saccharomycotina | no  | /                                                                                                           | /   | /   |
| Saccharomycetaceae sp.         | AAC | TATGGGTCTC<br>TCAGCGGTGT<br>GGTG      | 24 | Saccharomycotina | yes | CP006020.1;CP006021.1;<br>CP006022.1;CP006023.1;<br>CP006025.1;CP006026.1                                   | 6/8 | 697 |
| Kazachstania naganishii        | KNA | /                                     | 0  | Saccharomycotina | no  | /                                                                                                           | /   | /   |
| Kazachstania africana          | KAF | /                                     | 0  | Saccharomycotina | no  | /                                                                                                           | /   | /   |
| Tetrapisispora blattae         | TBL | /                                     | 0  | Saccharomycotina | no  | /                                                                                                           | /   | /   |
| Tetrapisispora phaffii         | TPF | /                                     | 0  | Saccharomycotina | no  | /                                                                                                           | /   | /   |
| Zygorulasporea mrakii          | ZMR | TAGGGGTGCG<br>GTG                     | 13 | Saccharomycotina | yes | NC_050719.1;NC_050720.1;<br>NC_050722.1;NC_050723.1;<br>NC_050724.1;NC_050726.1                             | 6/8 | 355 |

|                                     |     |                                    |      |                  |     |                                                                                                                                                                        |       |     |
|-------------------------------------|-----|------------------------------------|------|------------------|-----|------------------------------------------------------------------------------------------------------------------------------------------------------------------------|-------|-----|
| <i>Eremothecium cymbalariae</i>     | ERC | TACGGGTCTC<br>TCAGCGGTGT<br>GGTG   | 24   | Saccharomycotina | yes | NC_016451.1;NC_016452.1;<br>NC_016453.1;NC_016454.1;<br>NC_016456.1                                                                                                    | 5/8   | 298 |
| <i>Eremothecium gossypii</i>        | AGO | TACGGGTCTC<br>TCAGCGGTGT<br>GGTG   | 24   | Saccharomycotina | yes | NC_005782.2;NC_005783.5;<br>NC_005784.3;NC_005785.6;<br>NC_005786.2;NC_005787.5;<br>NC_005788.4                                                                        | 7/8   | 672 |
| <i>Naumovozya dairenensis</i>       | NDI | /                                  | 0    | Saccharomycotina | no  | /                                                                                                                                                                      | /     | /   |
| <i>Naumovozya castelli</i>          | NCS | /                                  | 0    | Saccharomycotina | no  | /                                                                                                                                                                      | /     | /   |
| [ <i>Candida</i> ] <i>glabrata</i>  | CGR | TCTGGGTGCT<br>GTGGGG               | 16   | Saccharomycotina | yes | CP048234.1;CP048230.1;<br>CP048240.1;CP048241.1;<br>CP048236.1;CP048235.1;<br>CP048232.1;CP048238.1;<br>CP048233.1;CP048237.1;<br>CP048231.1;CP048239.1;<br>CP048242.1 | 13/13 | 817 |
| <i>Zygosaccharomyces parabailii</i> | ZPA | /                                  | 0    | Saccharomycotina | no  | /                                                                                                                                                                      | /     | /   |
| <i>Zygosaccharomyces rouxii</i>     | ZRO | /                                  | 0    | Saccharomycotina | no  | /                                                                                                                                                                      | /     | /   |
| <i>Torulaspora delbrueckii</i>      | TDL | TAAGGTTGTG<br>GTG                  | 13   | Saccharomycotina | yes | NC_016501.1                                                                                                                                                            | 1/8   | 214 |
| <i>Lachancea mirantina</i>          | LMI | TGGAGGAGGA<br>GTG                  | 13   | Saccharomycotina | yes | LT598466.1;LT598469.1                                                                                                                                                  | 2/8   | 52  |
| <i>Lachancea dasiensis</i>          | LDA | /                                  | 0    | Saccharomycotina | no  | /                                                                                                                                                                      | /     | /   |
| <i>Lachancea nothofagi</i>          | LNO | /                                  | 0    | Saccharomycotina | no  | /                                                                                                                                                                      | /     | /   |
| <i>Lachancea thermotolerans</i>     | LTH | GTGGAGTAC                          | 9    | Saccharomycotina | yes | NC_013077.1;NC_013082.1;<br>NC_013084.1                                                                                                                                | 3/8   | 153 |
| <i>Lachancea meyersii</i>           | LME | /                                  | 0    | Saccharomycotina | no  | /                                                                                                                                                                      | /     | /   |
| <i>Lachancea fermentati</i>         | LFE | /                                  | 0    | Saccharomycotina | no  | /                                                                                                                                                                      | /     | /   |
| <i>Lachancea kluyveri</i>           | LKL | TGGACATGCG<br>TACTGTGAGG<br>TCTGGG | 26   | Saccharomycotina | yes | CM000687.1;CM000688.1;<br>CM000689.1;CM000691.1                                                                                                                        | 4/8   | 648 |
| <i>Saccharomyces eubayanus</i>      | SEU | T(G)2-3(TG)1-6                     | 5~16 | Saccharomycotina | /   | /                                                                                                                                                                      | /     | /   |
| <i>Saccharomyces arboricola</i>     | SAR | T(G)2-3(TG)1-6                     | 5~16 | Saccharomycotina | /   | /                                                                                                                                                                      | /     | /   |
| <i>Saccharomyces boulardii</i>      | SBO | T(G)2-3(TG)1-6                     | 5~16 | Saccharomycotina | /   | /                                                                                                                                                                      | /     | /   |
| <i>Saccharomyces kudriavzevii</i>   | SKU | T(G)2-3(TG)1-6                     | 5~16 | Saccharomycotina | /   | /                                                                                                                                                                      | /     | /   |
| <i>Saccharomyces pastorianus</i>    | SPS | T(G)2-3(TG)1-6                     | 5~16 | Saccharomycotina | /   | /                                                                                                                                                                      | /     | /   |
| <i>Saccharomyces paradoxus</i>      | SPR | T(G)2-3(TG)1-6                     | 5~16 | Saccharomycotina | /   | /                                                                                                                                                                      | /     | /   |
| <i>Saccharomyces cerevisiae</i>     | SCE | T(G)2-3(TG)1-6                     | 5~16 | Saccharomycotina | /   | /                                                                                                                                                                      | /     | /   |
| <i>Kluyveromyces lactis</i>         | KLA | TTAGGTATGT<br>GGTGTACGGA<br>TTTGA  | 25   | Saccharomycotina | yes | NC_006037.1;NC_006038.1;<br>NC_006039.1;NC_006040.1;<br>NC_006041.1;NC_006042.1                                                                                        | 6/8   | 708 |
| <i>Kluyveromyces marxianus</i>      | KMX | TTAGGTATGT<br>GGTGTACGGA<br>TTTGA  | 25   | Saccharomycotina | yes | NC_036030.1;NC_036025.1;<br>NC_036028.1;NC_036029.1;<br>NC_036032.1;NC_036027.1;<br>NC_036031.1;NC_036026.1                                                            | 8/9   | 750 |
| <i>Ogataea parapolyomorpha</i>      | OPA | GGTGGCGG<br>GTGTGTTACA             | 8    | Saccharomycotina | yes | NC_027860.1;NC_027863.1                                                                                                                                                | 2/7   | 78  |
| <i>Pichia kudriavzevii</i>          | PKZ | ATATGAACTA<br>GGAGCGAG             | 28   | Saccharomycotina | yes | NC_042507.1;NC_042509.1;<br>NC_042510.1                                                                                                                                | 3/5   | 529 |



|                              |     |             |    |                               |     |                                                                                                                                                                                    |       |     |
|------------------------------|-----|-------------|----|-------------------------------|-----|------------------------------------------------------------------------------------------------------------------------------------------------------------------------------------|-------|-----|
| Komagataella phaffii         | PPA | ATGCTGG     | 7  | Saccharomycotina              | yes | LT962476.1;LT962477.1;<br>LT962478.1;LT962479.1                                                                                                                                    | 4/4   | 237 |
| Komagataella pastoris        | KPA | ATGCTGG     | 7  | Saccharomycotina              | yes | CP014584.1;CP014585.1;<br>CP014587.1;CP014588.1;<br>CP014593.1;CP014586.1                                                                                                          | 6/11  | 357 |
| Cyberlindnera jadinii        | CJA | TCTGGGTG    | 8  | Saccharomycotina              | yes | DG000065.1;DG000066.1;<br>DG000067.1;DG000069.1;<br>DG000070.1                                                                                                                     | 5/13  | 443 |
| Schizosaccharomyces pombe    | SPO | G2-8TTAC(A) | 0  | Taphrinomycotina              | no  | /                                                                                                                                                                                  | /     | /   |
|                              |     |             |    |                               |     | RRCJ01000018.1;<br>RRCJ01000016.1;<br>RRCJ01000013.1<br>;RRCJ01000043.1;<br>RRCJ01000044.1;<br>RRCJ01000047.1;<br>RRCJ01000004.1;                                                  |       |     |
| Pyricularia sp.              | PYR | TTAGGG      | 6  | Pezizomycotina                | yes | RRCJ01000007.1;<br>RRCJ01000011.1;<br>RRCJ01000015.1;<br>RRCJ01000020.1;<br>RRCJ01000025.1;<br>RRCJ01000031.1                                                                      | 13/49 | 102 |
|                              |     |             |    |                               |     | CM012214.1;CM012215.1;<br>CM012216.1;CM012217.1;<br>CM012218.1;CM012219.1;<br>CM012220.1;CM012221.1                                                                                |       |     |
| Byssochlamys spectabilis     | BSP | TTAGGG      | 7  | Pezizomycotina                | yes | CP054649.1;CP054643.1;<br>CP054652.1;CP054650.1;<br>CP054640.1;CP054627.1;<br>CP054628.1;CP054630.1;<br>CP054636.1;CP054654.1;<br>CP054635.1;CP054638.1;<br>CP054633.1;CP054642.1; | 8/10  | 112 |
|                              |     |             |    |                               |     | CP054653.1;CP054641.1;<br>CP054647.1;CP054639.1;<br>CP054632.1;CP054644.1;<br>CP054629.1;CP054637.1;<br>CP054646.1;CP054634.1                                                      |       |     |
| Exserohilum turcica          | ETE | TTAGGG      | 6  | Pezizomycotina                | yes |                                                                                                                                                                                    | 24/30 | 181 |
| Antonospora locustae         | ALO | /           | 0  | Fungi incertae sedis          | no  | /                                                                                                                                                                                  | /     | /   |
| Encephalitozoon romaleae     | ERO | /           | 0  | Fungi incertae sedis          | no  | /                                                                                                                                                                                  | /     | /   |
| Encephalitozoon intestinalis | EIN | /           | 0  | Fungi incertae sedis          | no  | /                                                                                                                                                                                  | /     | /   |
| Encephalitozoon hellem       | EHE | /           | 0  | Fungi incertae sedis          | no  | /                                                                                                                                                                                  | /     | /   |
| Encephalitozoon cuniculi     | ECU | GGTTATGTGT  | 10 | Fungi incertae sedis          | yes | NC_003242.2                                                                                                                                                                        | 1/11  | 70  |
|                              |     |             |    |                               |     | CM016808.1;CM016811.1;<br>CM016812.1;CM016813.1;<br>CM016814.1;CM016816.1;<br>CM016817.1                                                                                           |       |     |
| Pleurotus ostreatus          | POS | TTAGGG      | 6  | Agaricomycotina;Basidiomycota | yes |                                                                                                                                                                                    | 7/11  | 48  |

|                         |     |         |   |                                  |     |                                                                                                                                                                                                                                                                                                                                                                                                                                                                                                                                                 |       |     |
|-------------------------|-----|---------|---|----------------------------------|-----|-------------------------------------------------------------------------------------------------------------------------------------------------------------------------------------------------------------------------------------------------------------------------------------------------------------------------------------------------------------------------------------------------------------------------------------------------------------------------------------------------------------------------------------------------|-------|-----|
| Pyrrhoderma noxium      | PNX | TGTTAGG | 7 | Agaricomycotina;Basidiomycota    | yes | CM008251.1;CM008252.1;CM008254.1;CM008255.1;CM008256.1;CM008258.1;CM008260.1                                                                                                                                                                                                                                                                                                                                                                                                                                                                    | 7/13  | 463 |
| Ustilago maydis         | UMA | TTAGGG  | 6 | Ustilaginomycotina;Basidiomycota | yes | NC_026481.1;NC_026497.1                                                                                                                                                                                                                                                                                                                                                                                                                                                                                                                         | 2/23  | 372 |
| Ustilago bromivora      | UBR | TTAGGG  | 6 | Ustilaginomycotina;Basidiomycota | yes | LT558129.1;LT558126.1;LT558118.1;LT558125.1;LT558134.1;LT558120.1;LT558121.1;LT558127.1;LT558137.1;LT558122.1;LT558135.1;LT558128.1;LT558138.1;LT558124.1;LT558133.1;LT558136.1;LT558130.1;LT558123.1;LT558119.1;LT558117.1;LT558139.1;LT558131.1;CP019373.1;CP019382.1;CP019376.1;CP019377.1;CP019381.1;CP019378.1;CP019371.1;CP019372.1;CP019380.1;CP019379.1;CP019375.1;CP019370.1;CP019374.1                                                                                                                                                | 22/24 | 208 |
| Trametes hirsuta        | THI | TTAGGG  | 6 | Agaricomycotina;Basidiomycota    | yes | CP019371.1;CP019372.1;CP019380.1;CP019379.1;CP019375.1;CP019370.1;CP019374.1                                                                                                                                                                                                                                                                                                                                                                                                                                                                    | 13/13 | 286 |
| Sporisorium reilianum   | SRE | /       | 0 | Ustilaginomycotina;Basidiomycota | no  | /                                                                                                                                                                                                                                                                                                                                                                                                                                                                                                                                               | /     | /   |
| Sporisorium scitamineum | SSC | TTAGGG  | 6 | Ustilaginomycotina;Basidiomycota | yes | CP010923.1;CP010916.1;CP010927.1;CP010913.1;CP010919.1;CP010928.1;CP010917.1;CP010925.1;CP010924.1;CP010915.1;CP010934.1;CP010935.1;CP010914.1;CP010931.1;CP010926.1;CP010930.1;CP010929.1;CP010938.1;CP010932.1;CP010936.1;CP010918.1;CP010922.1;CP010921.1;CP010920.1;NC_043737.1;NC_043735.1;NC_043726.1;NC_043738.1;NC_043727.1;NC_043732.1;NC_043719.1;NC_043721.1;NC_043736.1;NC_043734.1;NC_043723.1;NC_043722.1;NC_043731.1;NC_043730.1;NC_043725.1;NC_043729.1;NC_043728.1;NC_043733.1;NC_043737.1;NC_043720.1;NC_043724.1;NC_043739.1 | 24/27 | 139 |
| Sporisorium graminicola | SGR | TTAGGG  | 6 | Ustilaginomycotina;Basidiomycota | yes | NC_043723.1;NC_043722.1;NC_043731.1;NC_043730.1;NC_043725.1;NC_043729.1;NC_043728.1;NC_043733.1;NC_043737.1;NC_043720.1;NC_043724.1;NC_043739.1                                                                                                                                                                                                                                                                                                                                                                                                 | 22/22 | 328 |

|                          |          |           |   |                                  |     |                                                                                                                                                                                                                                                                                                                                                                                                                                                                                             |       |     |
|--------------------------|----------|-----------|---|----------------------------------|-----|---------------------------------------------------------------------------------------------------------------------------------------------------------------------------------------------------------------------------------------------------------------------------------------------------------------------------------------------------------------------------------------------------------------------------------------------------------------------------------------------|-------|-----|
| Malassezia restricta     | MRT      | TTAGTG    | 6 | Ustilaginomycotina;Basidiomycota | yes | NC_040194.1;NC_040193.1;<br>NC_040195.1;NC_040194.1;<br>NC_040198.1;NC_040196.1;<br>NC_040200.1;NC_040199.1;<br>NC_040201.1;NC_040197.1<br>CP046436.1;CP046435.1;<br>CP046439.1;CP046433.1;<br>CP046431.1;CP046432.1;<br>CP046437.1;CP046436.1;<br>CP046434.1;CP046438.1;<br>CP046440.1                                                                                                                                                                                                     | 10/10 | 312 |
| Malassezia globosa       | MGL      | TTAGTG    | 6 | Ustilaginomycotina;Basidiomycota | yes | LT671791.1;LT671792.1;<br>LT671795.1;LT671794.1;<br>LT671789.1;LT671790.1;<br>LT671793.1;LT671796.1<br>CP046237.1;CP046234.1;<br>CP046239.1;CP046236.1;<br>CP046238.1;CP046235.1;<br>CP046240.1;CP046237.1<br>CM021160.1;CM021163.1;<br>CM021166.1;CM021167.1;<br>CM021169.1;CM021170.1;<br>CM021172.1;CM021173.1<br>CM022370.1;CM022377.1;<br>CM022376.1;CM022373.1;<br>CM022375.1;CM022372.1;<br>CM022374.1;CM022378.1;<br>CM022371.1;CM022369.1;<br>CM022370.1                           | 10/11 | 209 |
| Malassezia sympodialis   | MSY<br>M | TTAAGTG   | 7 | Ustilaginomycotina;Basidiomycota | yes | CM021160.1;CM021163.1;<br>CM021166.1;CM021167.1;<br>CM021169.1;CM021170.1;<br>CM021172.1;CM021173.1<br>CM022370.1;CM022377.1;<br>CM022376.1;CM022373.1;<br>CM022375.1;CM022372.1;<br>CM022374.1;CM022378.1;<br>CM022371.1;CM022369.1;<br>CM022370.1                                                                                                                                                                                                                                         | 8/8   | 285 |
| Malassezia furfur        | MFU      | TTAGGA    | 6 | Ustilaginomycotina;Basidiomycota | yes | CM021160.1;CM021163.1;<br>CM021166.1;CM021167.1;<br>CM021169.1;CM021170.1;<br>CM021172.1;CM021173.1<br>CM022370.1;CM022377.1;<br>CM022376.1;CM022373.1;<br>CM022375.1;CM022372.1;<br>CM022374.1;CM022378.1;<br>CM022371.1;CM022369.1;<br>CM022370.1                                                                                                                                                                                                                                         | 8/8   | 431 |
| Hericium erinaceus       | HER      | TTGGA     | 5 | Agaricomycotina;Basidiomycota    | yes | CM021160.1;CM021163.1;<br>CM021166.1;CM021167.1;<br>CM021169.1;CM021170.1;<br>CM021172.1;CM021173.1<br>CM022370.1;CM022377.1;<br>CM022376.1;CM022373.1;<br>CM022375.1;CM022372.1;<br>CM022374.1;CM022378.1;<br>CM022371.1;CM022369.1;<br>CM022370.1                                                                                                                                                                                                                                         | 8/15  | 65  |
| Flammulina velutipes     | FVL      | TTAGGG    | 6 | Agaricomycotina;Basidiomycota    | yes | CM021160.1;CM021163.1;<br>CM021166.1;CM021167.1;<br>CM021169.1;CM021170.1;<br>CM021172.1;CM021173.1<br>CM022370.1;CM022377.1;<br>CM022376.1;CM022373.1;<br>CM022375.1;CM022372.1;<br>CM022374.1;CM022378.1;<br>CM022371.1;CM022369.1;<br>CM022370.1                                                                                                                                                                                                                                         | 11/11 | 286 |
| Cryptococcus wingfieldii | CWI      | TTAGGGGG  | 8 | Agaricomycotina;Basidiomycota    | no  | /                                                                                                                                                                                                                                                                                                                                                                                                                                                                                           | /     | /   |
| Cryptococcus neoformans  | CNV      | TTAGGGGG  | 8 | Agaricomycotina;Basidiomycota    | yes | NC_006679.1;NC_006684.1;<br>NC_006685.1;NC_006694.1;<br>NC_006693.1;NC_006680.1;<br>NC_006692.1;NC_006686.1;<br>NC_006687.1;NC_006670.1;<br>NC_006683.1;NC_006681.1;<br>NC_006682.1;NC_006691.1<br>NC_014939.1;NC_014947.1;<br>NC_014949.1;NC_014940.1;<br>NC_014946.1;NC_014950.1;<br>NC_014948.1;NC_014944.1;<br>NC_014951.1;NC_014938.1;<br>NC_014942.1<br>CM016930.1;CM016932.1;<br>CM016940.1;CM016939.1;<br>CM016942.1;CM016934.1;<br>CM016931.1;CM016933.1;<br>CM016938.1;CM016936.1 | 14/14 | 96  |
| Cryptococcus gattii      | CGI      | TTAGGGGG  | 8 | Agaricomycotina;Basidiomycota    | yes | NC_006679.1;NC_006684.1;<br>NC_006685.1;NC_006694.1;<br>NC_006693.1;NC_006680.1;<br>NC_006692.1;NC_006686.1;<br>NC_006687.1;NC_006670.1;<br>NC_006683.1;NC_006681.1;<br>NC_006682.1;NC_006691.1<br>NC_014939.1;NC_014947.1;<br>NC_014949.1;NC_014940.1;<br>NC_014946.1;NC_014950.1;<br>NC_014948.1;NC_014944.1;<br>NC_014951.1;NC_014938.1;<br>NC_014942.1<br>CM016930.1;CM016932.1;<br>CM016940.1;CM016939.1;<br>CM016942.1;CM016934.1;<br>CM016931.1;CM016933.1;<br>CM016938.1;CM016936.1 | 11/14 | 104 |
| Cryptococcus floricola   | CFL      | TTAGCGGGG | 9 | Agaricomycotina;Basidiomycota    | yes | NC_006679.1;NC_006684.1;<br>NC_006685.1;NC_006694.1;<br>NC_006693.1;NC_006680.1;<br>NC_006692.1;NC_006686.1;<br>NC_006687.1;NC_006670.1;<br>NC_006683.1;NC_006681.1;<br>NC_006682.1;NC_006691.1<br>NC_014939.1;NC_014947.1;<br>NC_014949.1;NC_014940.1;<br>NC_014946.1;NC_014950.1;<br>NC_014948.1;NC_014944.1;<br>NC_014951.1;NC_014938.1;<br>NC_014942.1<br>CM016930.1;CM016932.1;<br>CM016940.1;CM016939.1;<br>CM016942.1;CM016934.1;<br>CM016931.1;CM016933.1;<br>CM016938.1;CM016936.1 | 10/14 | 91  |

|                                     |     |           |   |                                   |     |                                                                                                                                                                                                                                                                                          |       |     |
|-------------------------------------|-----|-----------|---|-----------------------------------|-----|------------------------------------------------------------------------------------------------------------------------------------------------------------------------------------------------------------------------------------------------------------------------------------------|-------|-----|
| <i>Cryptococcus cf. gattii</i>      | CGA | TTAG(3-4) | 7 | Agaricomycotina;Basid<br>iomycota | yes | CM018872.1;CM018860.1;<br>CM018868.1;CM018865.1;<br>CM018864.1;CM018861.1;<br>CM018867.1;CM018870.1;<br>CM018866.1;CM018869.1;<br>CM018871.1;CM018862.1;<br>CM018863.1                                                                                                                   | 13/13 | 79  |
| <i>Apiotrichum mycotoxinovorans</i> | AMY | TTAGGGG   | 7 | Agaricomycotina;Basid<br>iomycota | yes | CP053620.1;CP053624.1                                                                                                                                                                                                                                                                    | 2/7   | 97  |
| <i>Agaricus bisporus</i>            | ABP | TTAGGGGG  | 8 | Agaricomycotina;Basid<br>iomycota | yes | CP015481.1;CP015476.1;<br>CP015482.1;CP015479.1;<br>CP015472.1;CP015471.1;<br>CP015470.1;CP015473.1;<br>CP015474.1;CP015477.1<br>CM024087.1;CM024086.1;<br>CM024085.1;CM024093.1;<br>CM024095.1;CM024090.1;<br>CM024092.1;CM024091.1;<br>CM024088.1;CM024094.1;<br>CM024089.1;CM024084.1 | 10/13 | 88  |
| <i>Hypsizygus marmoreus</i>         | HMA | TTAGGG    | 6 | Agaricomycotina;Basid<br>iomycota | yes |                                                                                                                                                                                                                                                                                          | 12/12 | 145 |

---

Table S3A: SV frequency of telomere (HSA)

| end   | chr_name    | chr   | telomere length | motif count | SV count | SV frequency |
|-------|-------------|-------|-----------------|-------------|----------|--------------|
| left  | NC_060925.1 | chr1  | 2700            | 438         | 98       | 0.22         |
| left  | NC_060926.1 | chr2  | 3616            | 570         | 175      | 0.31         |
| left  | NC_060927.1 | chr3  | 2636            | 436         | 70       | 0.16         |
| left  | NC_060928.1 | chr4  | 3258            | 533         | 120      | 0.23         |
| left  | NC_060929.1 | chr5  | 2295            | 367         | 53       | 0.14         |
| left  | NC_060930.1 | chr6  | 2892            | 475         | 36       | 0.08         |
| left  | NC_060931.1 | chr7  | 3412            | 554         | 93       | 0.17         |
| left  | NC_060932.1 | chr8  | 2512            | 405         | 104      | 0.26         |
| left  | NC_060933.1 | chr9  | 3630            | 585         | 119      | 0.20         |
| left  | NC_060934.1 | chr10 | 2636            | 429         | 68       | 0.16         |
| left  | NC_060935.1 | chr11 | 1983            | 319         | 35       | 0.11         |
| left  | NC_060936.1 | chr12 | 3101            | 487         | 124      | 0.25         |
| left  | NC_060937.1 | chr13 | 2541            | 423         | 7        | 0.02         |
| left  | NC_060938.1 | chr14 | 2073            | 344         | 4        | 0.01         |
| left  | NC_060939.1 | chr15 | 3253            | 531         | 161      | 0.30         |
| left  | NC_060940.1 | chr16 | 2268            | 374         | 71       | 0.19         |
| left  | NC_060941.1 | chr17 | 2205            | 364         | 76       | 0.21         |
| left  | NC_060942.1 | chr18 | 2942            | 336         | 20       | 0.06         |
| left  | NC_060943.1 | chr19 | 2281            | 357         | 68       | 0.19         |
| left  | NC_060944.1 | chr20 | 2723            | 443         | 66       | 0.15         |
| left  | NC_060945.1 | chr21 | 3008            | 460         | 53       | 0.12         |
| left  | NC_060946.1 | chr22 | 4574            | 736         | 74       | 0.10         |
| left  | NC_060947.1 | chrX  | 1822            | 302         | 37       | 0.12         |
| left  | NC_060948.1 | chrY  | 5654            | 941         | 34       | 0.04         |
| right | NC_060925.1 | chr1  | 3185            | 512         | 102      | 0.20         |
| right | NC_060926.1 | chr2  | 2621            | 424         | 64       | 0.15         |
| right | NC_060927.1 | chr3  | 4612            | 746         | 172      | 0.23         |
| right | NC_060928.1 | chr4  | 2296            | 373         | 45       | 0.12         |
| right | NC_060929.1 | chr5  | 1553            | 255         | 42       | 0.16         |
| right | NC_060930.1 | chr6  | 2778            | 450         | 52       | 0.12         |
| right | NC_060931.1 | chr7  | 2219            | 357         | 70       | 0.20         |

|       |             |       |      |      |     |      |
|-------|-------------|-------|------|------|-----|------|
| right | NC_060932.1 | chr8  | 1842 | 454  | 152 | 0.33 |
| right | NC_060933.1 | chr9  | 2970 | 474  | 153 | 0.32 |
| right | NC_060934.1 | chr10 | 3196 | 515  | 109 | 0.21 |
| right | NC_060935.1 | chr11 | 2589 | 422  | 44  | 0.10 |
| right | NC_060936.1 | chr12 | 2337 | 375  | 40  | 0.11 |
| right | NC_060937.1 | chr13 | 3499 | 572  | 61  | 0.11 |
| right | NC_060938.1 | chr14 | 1652 | 267  | 34  | 0.13 |
| right | NC_060939.1 | chr15 | 2929 | 464  | 61  | 0.13 |
| right | NC_060940.1 | chr16 | 2678 | 435  | 49  | 0.11 |
| right | NC_060941.1 | chr17 | 2996 | 476  | 52  | 0.11 |
| right | NC_060942.1 | chr18 | 3489 | 557  | 132 | 0.24 |
| right | NC_060943.1 | chr19 | 2934 | 465  | 57  | 0.12 |
| right | NC_060944.1 | chr20 | 3153 | 490  | 118 | 0.24 |
| right | NC_060945.1 | chr21 | 4548 | 730  | 79  | 0.11 |
| right | NC_060946.1 | chr22 | 2931 | 467  | 87  | 0.19 |
| right | NC_060947.1 | chrX  | 2943 | 468  | 101 | 0.22 |
| right | NC_060948.1 | chrY  | 6389 | 1023 | 113 | 0.11 |

---

Table S3B: SV frequency of telomere (ATH)

| end   | chr_name   | chr  | telomere length | motif count | SV count | SV frequency |
|-------|------------|------|-----------------|-------------|----------|--------------|
| left  | CP087126.1 | chr1 | 3257            | 439         | 9        | 0.02         |
| left  | CP087127.1 | chr2 | 2946            | 379         | 4        | 0.01         |
| left  | CP087128.1 | chr3 | 3263            | 443         | 35       | 0.08         |
| left  | CP087129.1 | chr4 | 0               | 0           | 0        | NAN          |
| left  | CP087130.1 | chr5 | 3274            | 460         | 12       | 0.03         |
| right | CP087126.1 | chr1 | 3562            | 508         | 2        | 0.00         |
| right | CP087127.1 | chr2 | 3611            | 497         | 84       | 0.17         |
| right | CP087128.1 | chr3 | 3006            | 424         | 11       | 0.03         |
| right | CP087129.1 | chr4 | 3385            | 467         | 64       | 0.14         |
| right | CP087130.1 | chr5 | 4480            | 475         | 30       | 0.06         |

Table S3C: SV frequency of telomere (YLI)

| end   | chr_name   | chr  | telomere length | motif count | SV count | SV frequency |
|-------|------------|------|-----------------|-------------|----------|--------------|
| left  | CP061012.1 | chrA | 369             | 37          | 0        | 0.00         |
| left  | CP061013.1 | chrB | 0               | 0           | 0        | NAN          |
| left  | CP061014.1 | chrC | 663             | 63          | 13       | 0.21         |
| left  | CP061015.1 | chrD | 256             | 21          | 4        | 0.19         |
| left  | CP061016.1 | chrE | 0               | 0           | 0        | NAN          |
| left  | CP061017.1 | chrF | 0               | 0           | 0        | NAN          |
| right | CP061012.1 | chrA | 520             | 48          | 0        | 0.00         |
| right | CP061013.1 | chrB | 0               | 0           | 0        | NAN          |
| right | CP061014.1 | chrC | 478             | 38          | 13       | 0.34         |
| right | CP061015.1 | chrD | 434             | 42          | 6        | 0.14         |
| right | CP061016.1 | chrE | 303             | 30          | 1        | 0.03         |
| right | CP061017.1 | chrF | 383             | 38          | 1        | 0.03         |



Table S4A: coefficient for kmer length and repeat times in scoring and its detection result in five end of ATH

| kmer length | repeat times | kmer    | suppChr |
|-------------|--------------|---------|---------|
| 1           | 1            | CCCTAAA | 4       |
| 0.1         | 1            | CCCTAAA | 4       |
| 0.2         | 1            | CCCTAAA | 4       |
| 0.3         | 1            | CCCTAAA | 4       |
| 0.4         | 1            | CCCTAAA | 4       |
| 0.5         | 1            | CCCTAAA | 4       |
| 0.6         | 1            | CCCTAAA | 4       |
| 0.7         | 1            | CCCTAAA | 4       |
| 0.8         | 1            | CCCTAAA | 4       |
| 0.9         | 1            | CCCTAAA | 4       |
| 1           | 0.1          | CCCTAAA | 4       |
| 1           | 0.2          | CCCTAAA | 4       |
| 1           | 0.3          | CCCTAAA | 4       |
| 1           | 0.4          | CCCTAAA | 4       |
| 1           | 0.5          | CCCTAAA | 4       |
| 1           | 0.6          | CCCTAAA | 4       |
| 1           | 0.7          | CCCTAAA | 4       |
| 1           | 0.8          | CCCTAAA | 4       |
| 1           | 0.9          | CCCTAAA | 4       |
| 0.1         | 0.9          | CCCTAAA | 4       |
| 0.2         | 0.8          | CCCTAAA | 4       |
| 0.3         | 0.7          | CCCTAAA | 4       |
| 0.4         | 0.6          | CCCTAAA | 4       |
| 0.5         | 0.5          | CCCTAAA | 4       |
| 0.6         | 0.4          | CCCTAAA | 4       |
| 0.7         | 0.3          | CCCTAAA | 4       |
| 0.8         | 0.2          | CCCTAAA | 4       |
| 0.9         | 0.1          | CCCTAAA | 4       |

Table S4B: coefficient for kmer length and repeat times in scoring and its detection result in five end of YLI

| kmer length | repeat times | kmer        | suppChr |
|-------------|--------------|-------------|---------|
| 1           | 1            | ACTAACCCCTG | 3       |
| 0.1         | 1            | ACTAACCCCTG | 3       |
| 0.2         | 1            | ACTAACCCCTG | 3       |
| 0.3         | 1            | ACTAACCCCTG | 3       |
| 0.4         | 1            | ACTAACCCCTG | 3       |
| 0.5         | 1            | ACTAACCCCTG | 3       |
| 0.6         | 1            | ACTAACCCCTG | 3       |
| 0.7         | 1            | ACTAACCCCTG | 3       |
| 0.8         | 1            | ACTAACCCCTG | 3       |
| 0.9         | 1            | ACTAACCCCTG | 3       |
| 1           | 0.1          | ACTAACCCCTG | 1       |
| 1           | 0.2          | ACTAACCCCTG | 2       |
| 1           | 0.3          | ACTAACCCCTG | 2       |
| 1           | 0.4          | ACTAACCCCTG | 3       |
| 1           | 0.5          | ACTAACCCCTG | 3       |
| 1           | 0.6          | ACTAACCCCTG | 3       |
| 1           | 0.7          | ACTAACCCCTG | 3       |
| 1           | 0.8          | ACTAACCCCTG | 3       |
| 1           | 0.9          | ACTAACCCCTG | 3       |
| 0.1         | 0.9          | ACTAACCCCTG | 3       |
| 0.2         | 0.8          | ACTAACCCCTG | 3       |
| 0.3         | 0.7          | ACTAACCCCTG | 3       |
| 0.4         | 0.6          | ACTAACCCCTG | 3       |
| 0.5         | 0.5          | ACTAACCCCTG | 3       |
| 0.6         | 0.4          | ACTAACCCCTG | 3       |
| 0.7         | 0.3          | ACTAACCCCTG | 2       |
| 0.8         | 0.2          | ACTAACCCCTG | 2       |
| 0.9         | 0.1          | ACTAACCCCTG | 1       |

Table S5: the possible reason for detection failure by TelFinder

| count | species                                                                                                                                                                                                                                                                                                                                                                                                                                                                                                                                                                                                                                                                                                                                                                                                                                                             | reason                              |
|-------|---------------------------------------------------------------------------------------------------------------------------------------------------------------------------------------------------------------------------------------------------------------------------------------------------------------------------------------------------------------------------------------------------------------------------------------------------------------------------------------------------------------------------------------------------------------------------------------------------------------------------------------------------------------------------------------------------------------------------------------------------------------------------------------------------------------------------------------------------------------------|-------------------------------------|
| 8     | <i>Saccharomyces eubayanus</i> , <i>Saccharomyces arboricola</i> , <i>Saccharomyces boulardii</i> , <i>Saccharomyces kudriavzevii</i> , <i>Saccharomyces pastorianus</i> , <i>Saccharomyces paradoxus</i> , <i>Saccharomyces paradoxus</i> , <i>Schizosaccharomyces pombe</i>                                                                                                                                                                                                                                                                                                                                                                                                                                                                                                                                                                                       | Variable telomeric repeat sequence  |
| 27    | <i>Cercospora sojina</i> , <i>Cercospora beticola</i> , <i>Fusarium verticillioides</i> , <i>Fusarium circinatum</i> , <i>Podospora comata</i> , <i>Podospora comata</i> , <i>Podospora comata</i> , <i>Hyphopichia burtonii</i> , <i>Candida orthopsilosis</i> , <i>Millerozyma farinosa</i> , <i>Kazachstania naganishii</i> , <i>Kazachstania africana</i> , <i>Tetrapisispora blattae</i> , <i>Tetrapisispora phaffii</i> , <i>Naumovozyma dairenensis</i> , <i>Naumovozyma castelli</i> , <i>Zygosaccharomyces parabailii</i> , <i>Zygosaccharomyces rouxii</i> , <i>Lachancea dasiensis</i> , <i>Lachancea nothofagi</i> , <i>Lachancea meyersii</i> , <i>Lachancea fermentati</i> , <i>Lachancea fermentati</i> , <i>Encephalitozoon romaleae</i> , <i>Encephalitozoon intestinalis</i> , <i>Encephalitozoon intestinalis</i> , <i>Sporisorium reilianum</i> | Too few repeat times to distinguish |
